# Supplementary material for: Antibacterial activity of structurally diverse natural prenylated isobavachalcone derivatives
Source: Royal Society of Chemistry journal article supplement (doi:10.1039/d4ra05370b), 2024-01-01
Supplement: d4ra05370b1.pdf [file d4ra05370b1.pdf]

## SUPPORTING INFORMATION

### Antibacterial Activity of Structurally Diverse Natural Prenylated Isobavachalcone Derivatives

Puneet Kumar,<sup>a,c</sup> Sapna Saini,<sup>b,c</sup> Anjali Gangwar,<sup>b,c</sup> Rashmi Sharma,<sup>b,c\*</sup> Jasha Momo H. Anal<sup>a,c\*</sup>

<sup>a</sup>Natural Products and Medicinal Chemistry Division, CSIR– Indian Institute of Integrative Medicine, Jammu-180001, India.

<sup>b</sup>Infectious Division, CSIR–Indian Institute of Integrative Medicine, Jammu-180001, India.

<sup>c</sup>Academy of Scientific and Innovative Research (AcSIR), Ghaziabad - 201002, India

#### List of content

| S. No. | List of Figures               | Page No. |
|--------|-------------------------------|----------|
| 1.     | IBC and synthesized compounds | 3        |
| 2.     | HPLC purity of IBC-1          | 4        |
| 3.     | <sup>1</sup> H NMR of IBC-1   | 5        |
| 4.     | <sup>13</sup> C NMR of IBC-1  | 5        |
| 5.     | HRMS of IBC-1                 | 6        |
| 6.     | HPLC purity of IBC-2          | 7        |
| 7.     | <sup>1</sup> H NMR of IBC-2   | 8        |
| 8.     | <sup>13</sup> C NMR of IBC-2  | 8        |
| 9.     | DEPT135 NMR of IBC-2          | 9        |
| 10.    | HRMS of IBC-2                 | 9        |
| 11.    | HPLC purity of IBC-3          | 10       |
| 12.    | <sup>1</sup> H NMR of IBC-3   | 11       |
| 13.    | <sup>13</sup> C NMR of IBC-3  | 11       |
| 14.    | DEPT135 NMR of IBC-3          | 12       |
| 15.    | HRMS of IBC-3                 | 12       |
| 16.    | <sup>1</sup> H NMR of IBC-4   | 13       |
| 17.    | <sup>13</sup> C NMR of IBC-4  | 13       |
| 18.    | HRMS of IBC-4                 | 14       |
| 19.    | <sup>1</sup> H NMR of IBC-5   | 15       |
| 20.    | <sup>13</sup> C NMR of IBC-5  | 15       |
| 21.    | HRMS of IBC-5                 | 16       |

|     |                                                                                                     |    |
|-----|-----------------------------------------------------------------------------------------------------|----|
| 22. | <sup>1</sup> H NMR of IBC-6                                                                         | 17 |
| 23. | <sup>13</sup> C NMR of IBC-6                                                                        | 17 |
| 24. | HRMS of IBC-6                                                                                       | 18 |
| 25. | <sup>1</sup> H NMR of IBC-7                                                                         | 19 |
| 26. | <sup>13</sup> C NMR of IBC-7                                                                        | 19 |
| 27. | HRMS of IBC-7                                                                                       | 20 |
| 28. | <sup>1</sup> H NMR of IBC-8                                                                         | 21 |
| 29. | <sup>13</sup> C NMR of IBC-8                                                                        | 21 |
| 30. | HRMS of IBC-8                                                                                       | 22 |
| 31. | <sup>1</sup> H NMR of IBC-9                                                                         | 23 |
| 32. | <sup>13</sup> C NMR of IBC-9                                                                        | 23 |
| 33. | HRMS of IBC-9                                                                                       | 24 |
| 34. | <sup>1</sup> H NMR of IBC-10                                                                        | 25 |
| 35. | <sup>13</sup> C NMR of IBC-10                                                                       | 25 |
| 36. | HRMS of IBC-10                                                                                      | 26 |
| 37. | MBC of potent inhibitors against <i>S. aureus</i> , MRSA, <i>E. coli</i> and <i>P. aeruginosa</i> . | 27 |

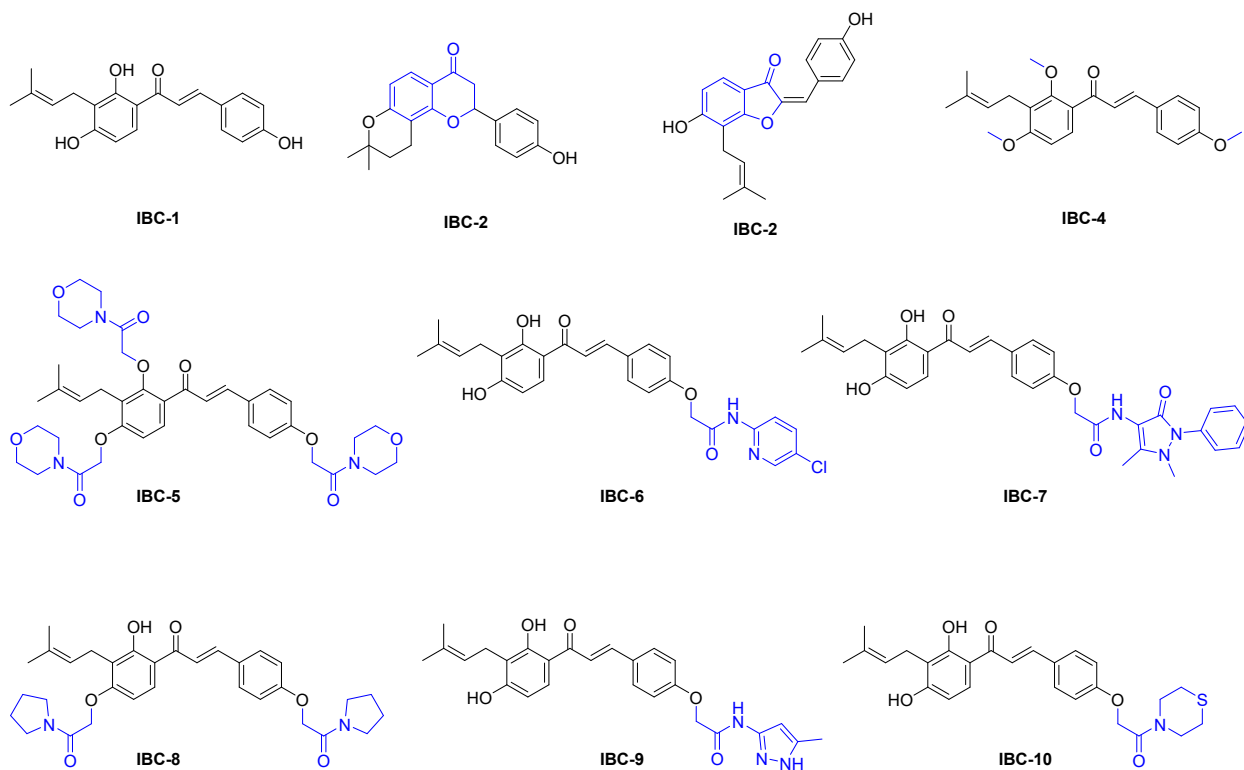

**Figure 1.** IBC and synthesized compounds

# HPLC purity of IBC-1

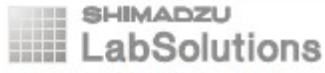

## Analysis Report

### <Sample Information>

Sample Name : ISB  
Sample ID : ISB  
Data Filename : 20-11-2023\_02.lcd  
Method Filename : 02-05-2023\_Gradient-04.lcm  
Batch Filename : 20.11.2023-01.lcb  
Vial # : 1-29  
Injection Volume : 5 uL  
Date Acquired : 20/11/2023 12:47:22  
Date Processed : 20/11/2023 14:13:14  
Sample Type : Unknown  
Acquired by : System Administrator  
Processed by : System Administrator

### <Chromatogram>

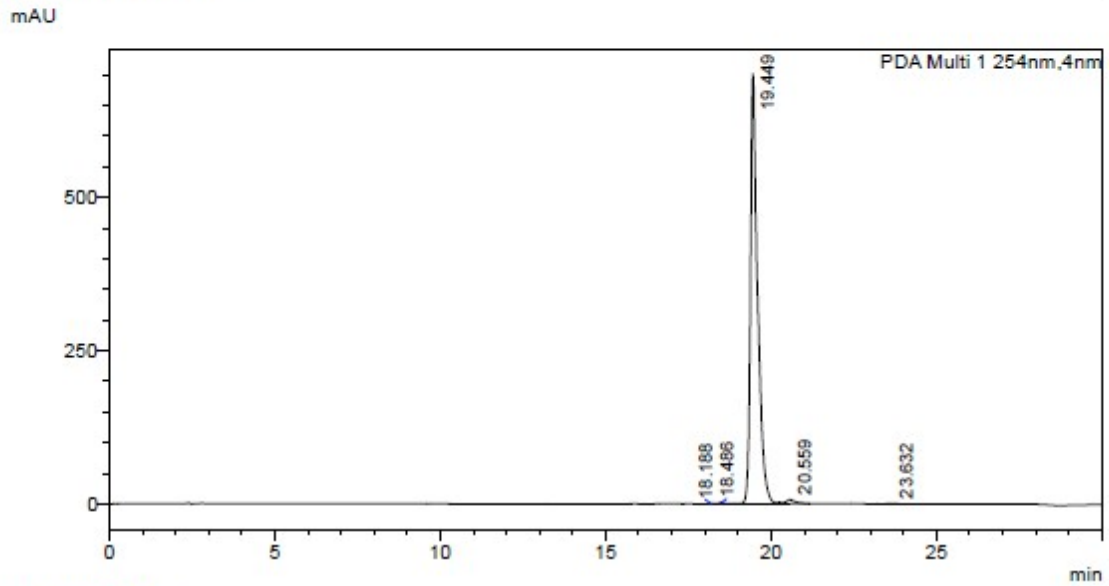

### <Peak Table>

| PDA Ch1 254nm |           |          |         |
|---------------|-----------|----------|---------|
| Peak#         | Ret. Time | Area     | Area%   |
| 1             | 18.188    | 7411     | 0.069   |
| 2             | 18.486    | 35302    | 0.328   |
| 3             | 19.449    | 10561885 | 98.187  |
| 4             | 20.559    | 141289   | 1.313   |
| 5             | 23.632    | 11041    | 0.103   |
| Total         |           | 10756928 | 100.000 |

# <sup>1</sup>H NMR of IBC-1

Jun30-2022  
ISB-2

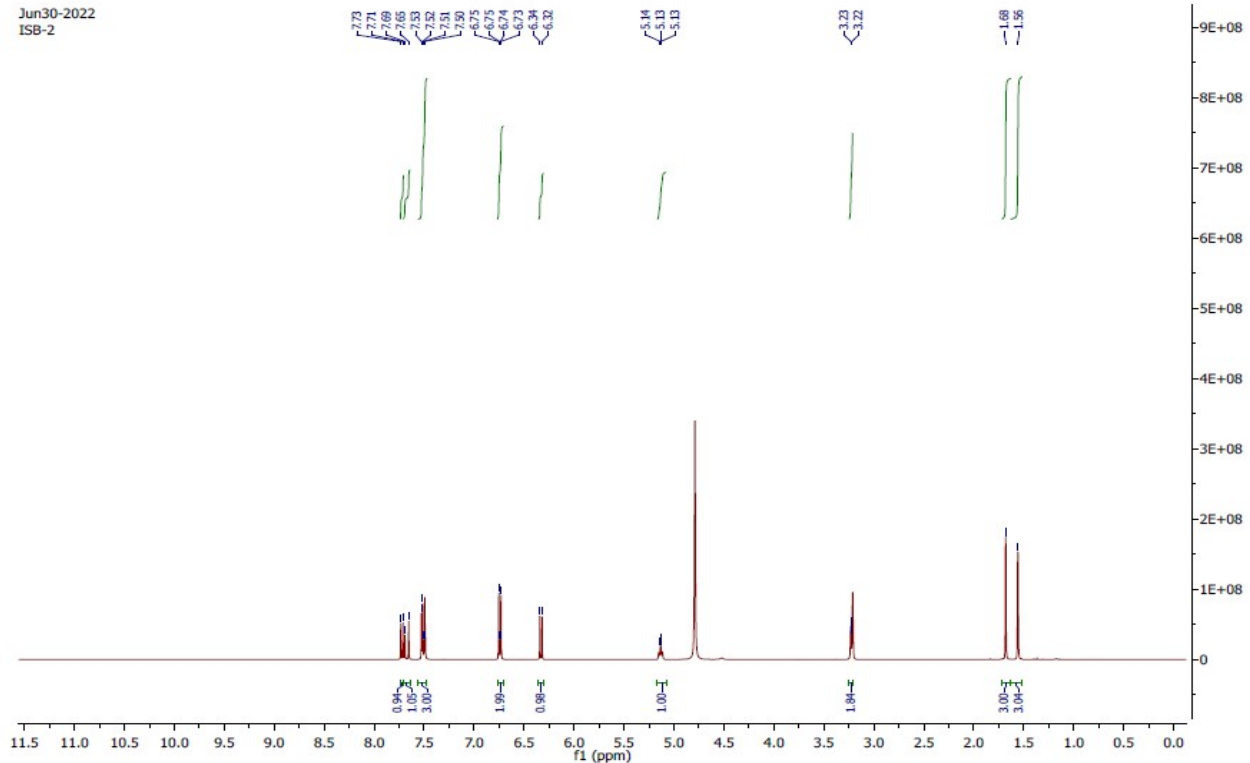

# <sup>13</sup>C NMR of IBC-1

Jun30-2022  
ISB-2

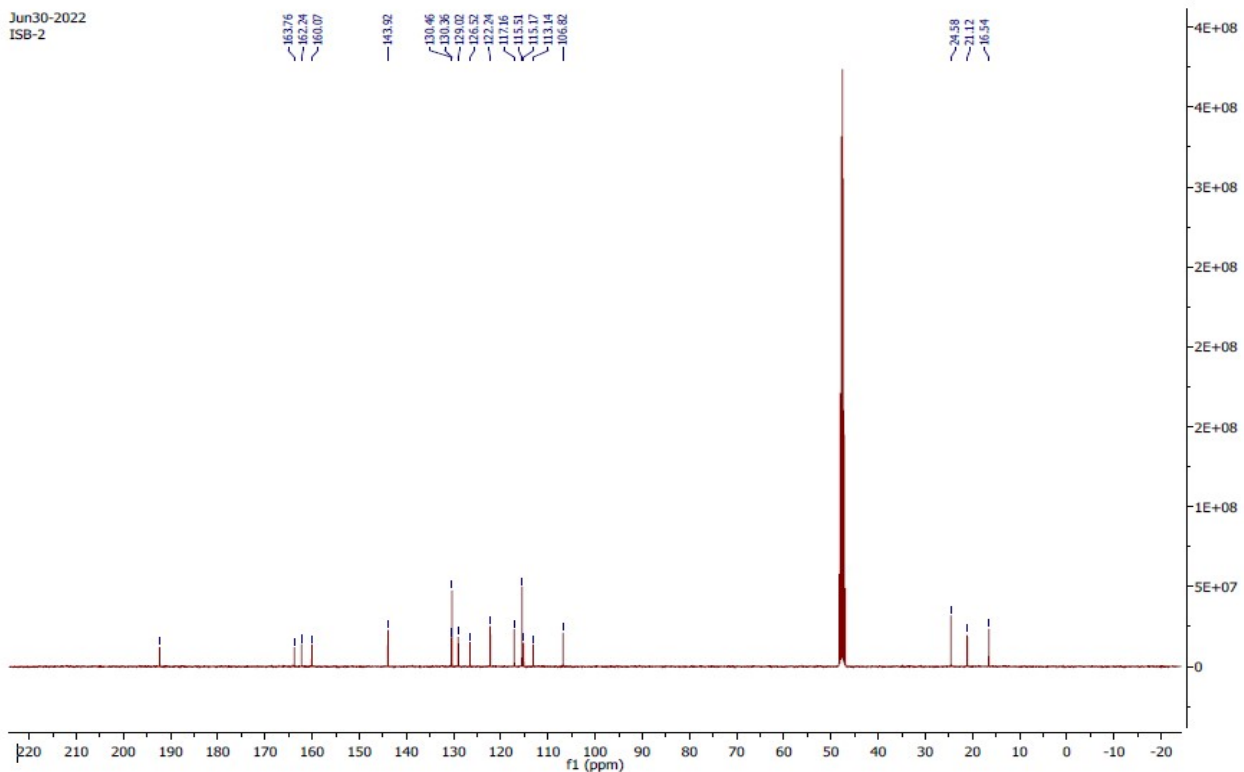

# HRMS of IBC-1

## Elemental Composition Report

### Single Mass Analysis

Tolerance = 50.0 PPM / DBE: min = -1.5, max = 50.0  
Element prediction: Off  
Number of isotope peaks used for i-FIT = 3

Monoisotopic Mass, Even Electron Ions

8 formula(e) evaluated with 1 results within limits (up to 3 closest results for each mass)

Elements Used:

C: 0-20 H: 0-100 O: 0-4

ISB-2

QMI DIVISION, CSIR-IIIM JAMMU  
Xevo G2-XS QTOF YFC2015

03-Jun-2022  
12:18:14  
1: TOF MS ES+  
1.87e+006

030622\_04 9 (0.208) Cm (9)

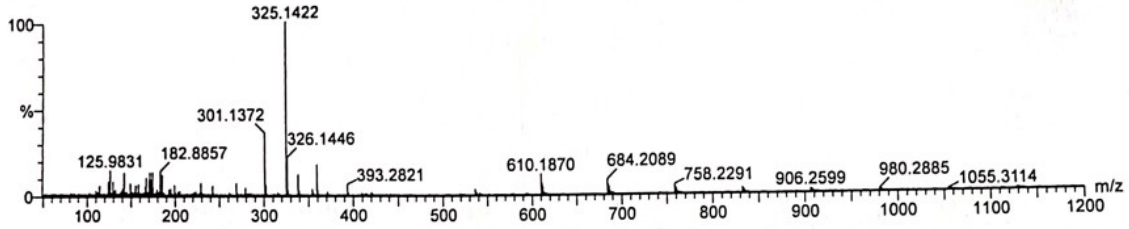

Minimum: -1.5  
Maximum: 2.0 50.0 50.0

| Mass     | Calc. Mass | mDa  | PPM  | DBE  | i-FIT | Norm | Conf (%) | Formula    |
|----------|------------|------|------|------|-------|------|----------|------------|
| 325.1422 | 325.1440   | -1.8 | -5.5 | 10.5 | 26.5  | n/a  | n/a      | C20 H21 O4 |

HPLC purity of IBC-2

# Natural Product Chemistry

USER: J.S.MOMO  
Data file: C:\Documents and Settings\user\Desktop\PK-NEW\PK-ISB-2A.rslt\PK-ISB-2.dat  
Method Name: C:\Documents and Settings\user\Desktop\PK-NEW\PK-ISB-2A.rslt\PK-N-2.met  
5/3/2024 3:19:56 PM (GMT +05:30)  
Sample ID: PK-ISB-2  
Injection Vol.: 5

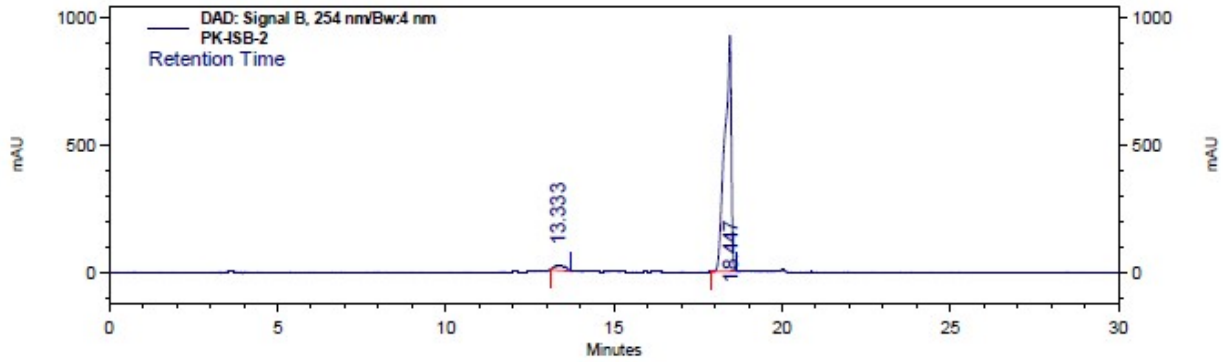

DAD:  
Signal B,  
254  
nm/Bw: 4 nm

Results

| Peak Number | Retention Time | Area     | Area Percent | Height  | Height Percent |
|-------------|----------------|----------|--------------|---------|----------------|
| 1           | 13.33          | 914693   | 3.34         | 36868   | 1.86           |
| 2           | 18.45          | 26471787 | 96.66        | 1942811 | 98.14          |
| Totals      |                | 27386480 | 100.00       | 1979679 | 100.00         |

# <sup>1</sup>H NMR of IBC-2

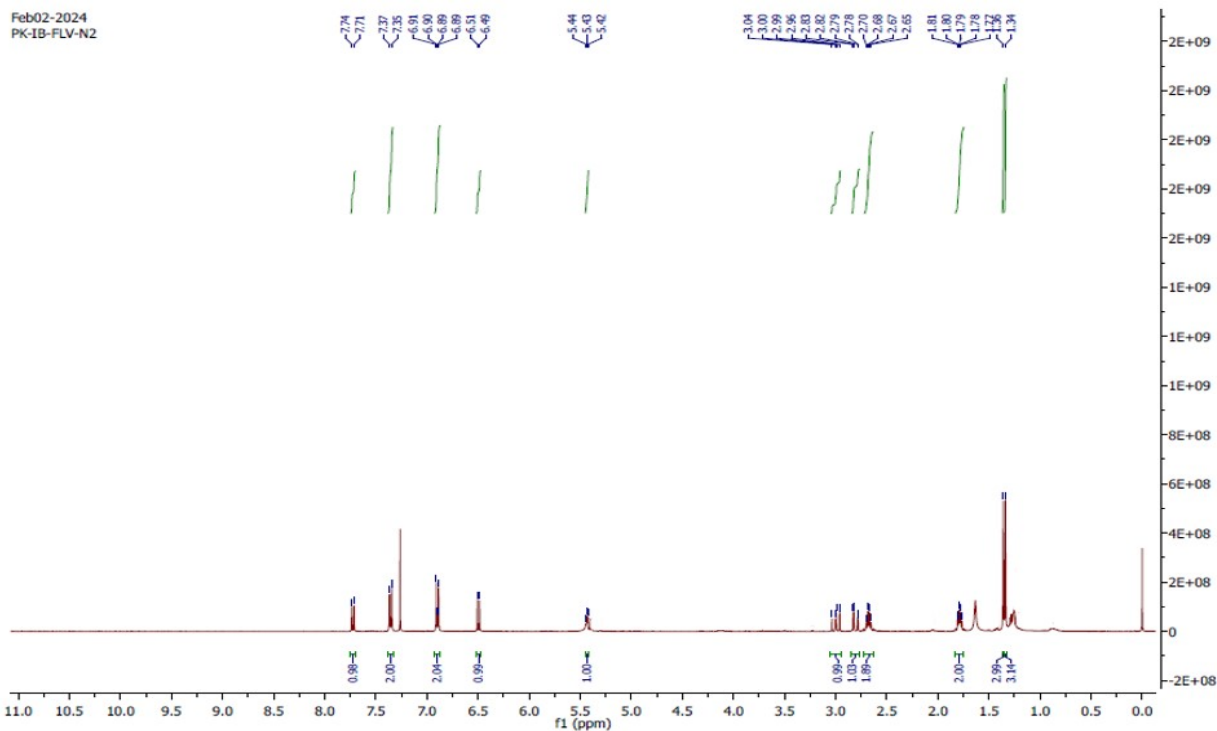

# <sup>13</sup>C NMR of IBC-2

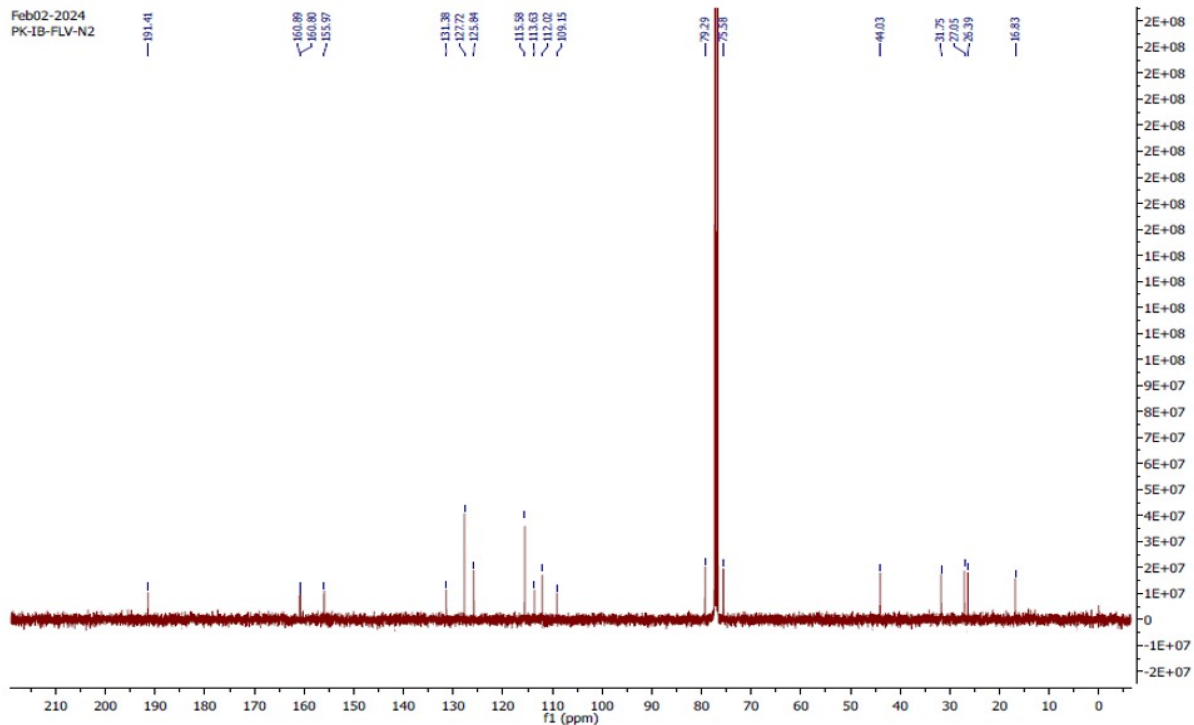



# DEPT135 NMR of IBC-2

Feb02-2024  
PK-IB-FLV-N2

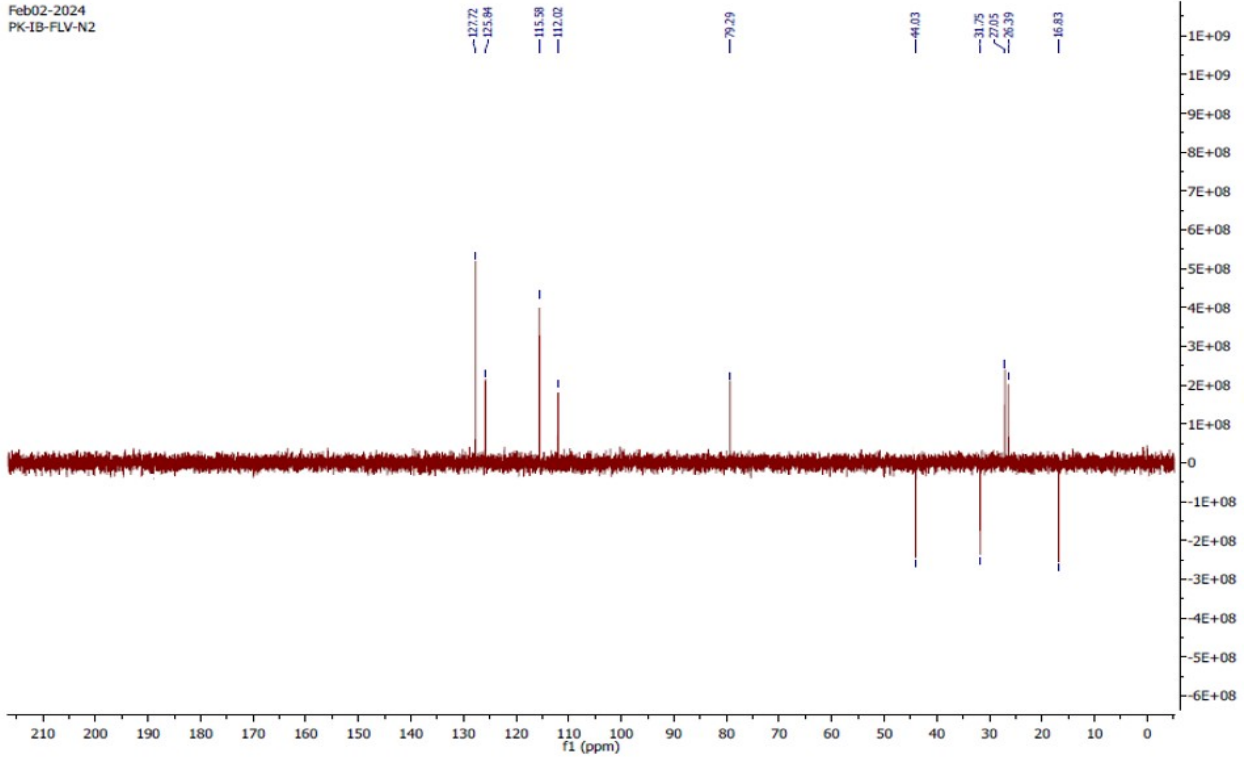

# HRMS of IBC-2

## Elemental Composition Report

Page 1

### Single Mass Analysis

Tolerance = 10.0 PPM / DBE: min = -1.5, max = 50.0

Element prediction: Off

Number of isotope peaks used for i-FIT = 3

Monoisotopic Mass, Even Electron Ions

8 formula(e) evaluated with 1 results within limits (up to 3 closest results for each mass)

Elements Used:

C: 0-20 H: 0-100 O: 0-4

PK-IB-FLV-N2

QMI DIVISION, CSIR-IIIM JAMMU  
Xevo G2-XS QTOF YFC2015

22-Feb-2024

12:49:25

1: TOF MS ES+

1.63e+008

220224\_11 7 (0.155)

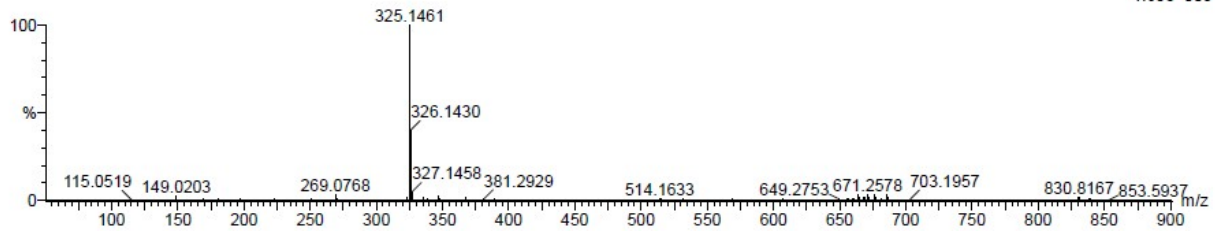

Minimum: -1.5  
Maximum: 2.0 10.0 50.0

| Mass     | Calc. Mass | mDa | PPM | DBE  | i-FIT  | Norm | Conf (%) | Formula    |
|----------|------------|-----|-----|------|--------|------|----------|------------|
| 325.1461 | 325.1440   | 2.1 | 6.5 | 10.5 | 1417.6 | n/a  | n/a      | C20 H21 O4 |

# HPLC purity of IBC-3

## Natural Product Chemistry

USER: J.S.MOMO  
Data file: C:\Documents and Settings\user\Desktop\PK-NEW\PK-ISB-AUR.rslt\PK-ISB-AUR.dat  
Method Name: C:\Documents and Settings\user\Desktop\PK-NEW\PK-ISB-AUR.rslt\PK-N.met  
4/29/2024 11:20:56 AM (GMT +05:30)  
Sample ID: PK-ISB-AUR  
Injection Vol.: 5

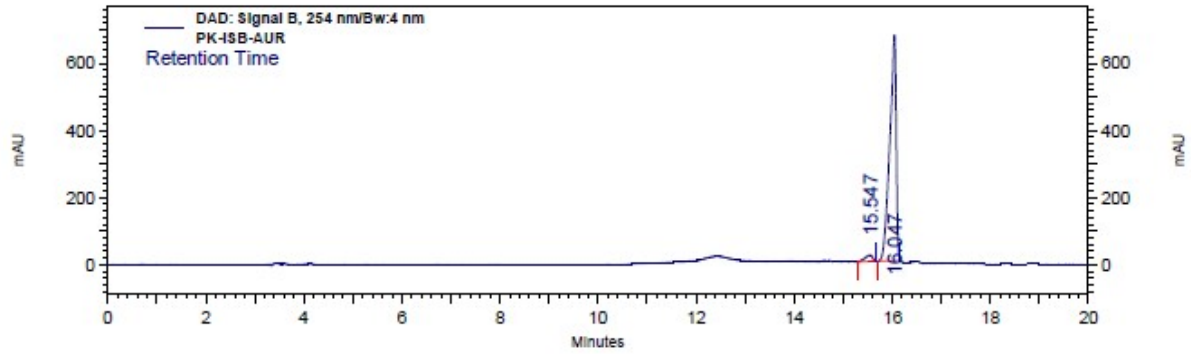

DAD:  
Signal B,  
254  
nm/Bw: 4 nm

### Results

| Peak Number | Retention Time | Area     | Area Percent | Height  | Height Percent |
|-------------|----------------|----------|--------------|---------|----------------|
| 1           | 15.55          | 428589   | 3.24         | 39516   | 2.73           |
| 2           | 16.05          | 12809207 | 96.76        | 1410232 | 97.27          |
| Totals      |                | 13237796 | 100.00       | 1449748 | 100.00         |

# <sup>1</sup>H NMR of IBC-3

Feb21-2024  
PK-15B-AUR-N2

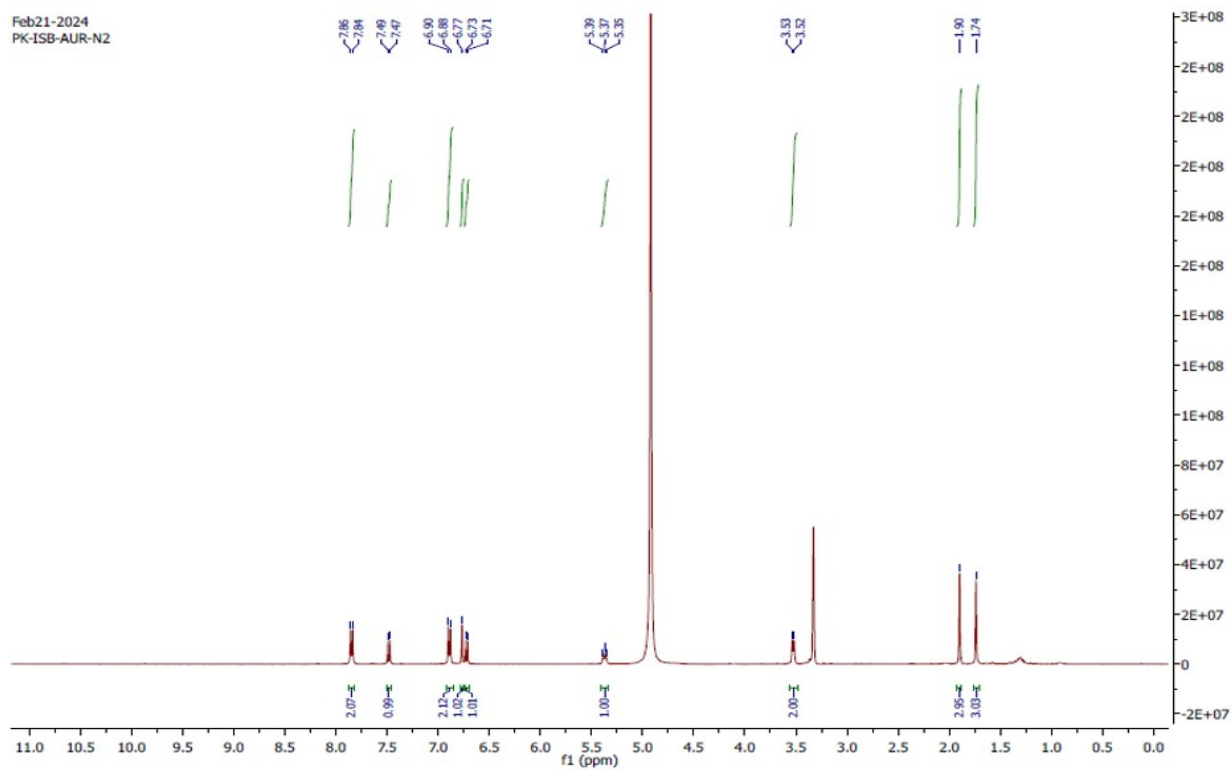

# <sup>13</sup>C NMR of IBC-3

Feb13-2024  
PK-15B-AUR-N2-C

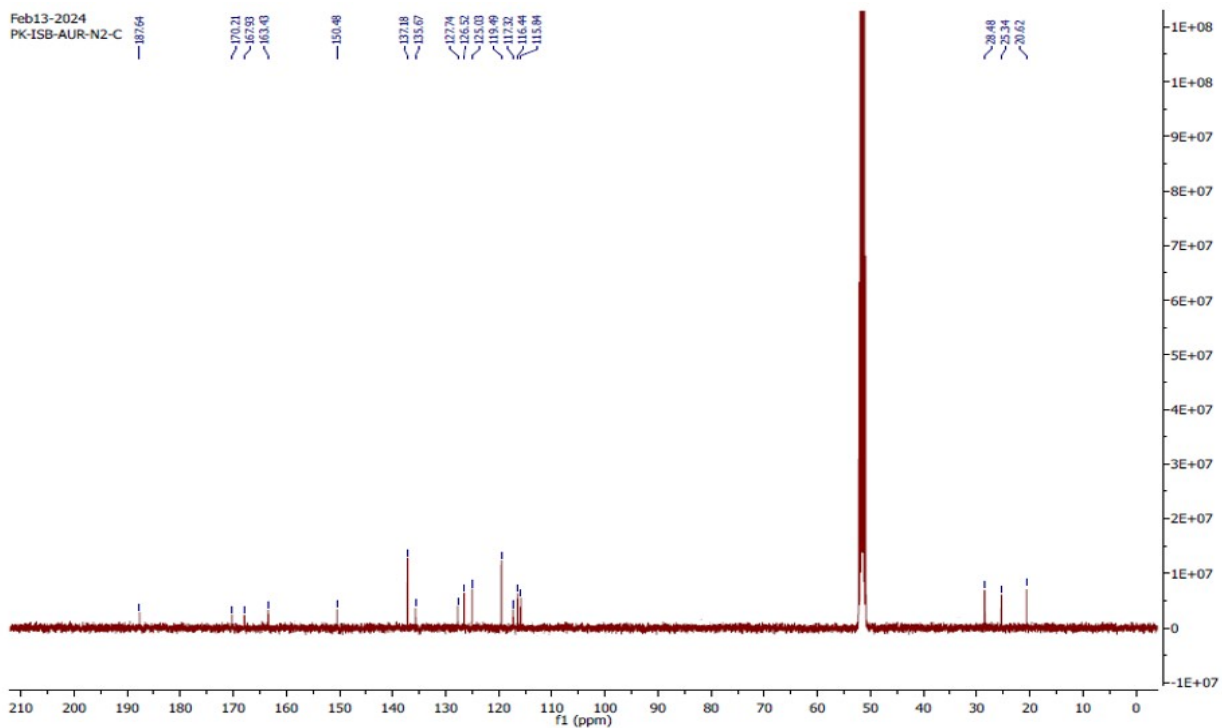

# DEPT135 NMR of IBC-3

Feb13-2024  
PK-ISB-AUR-N2-C

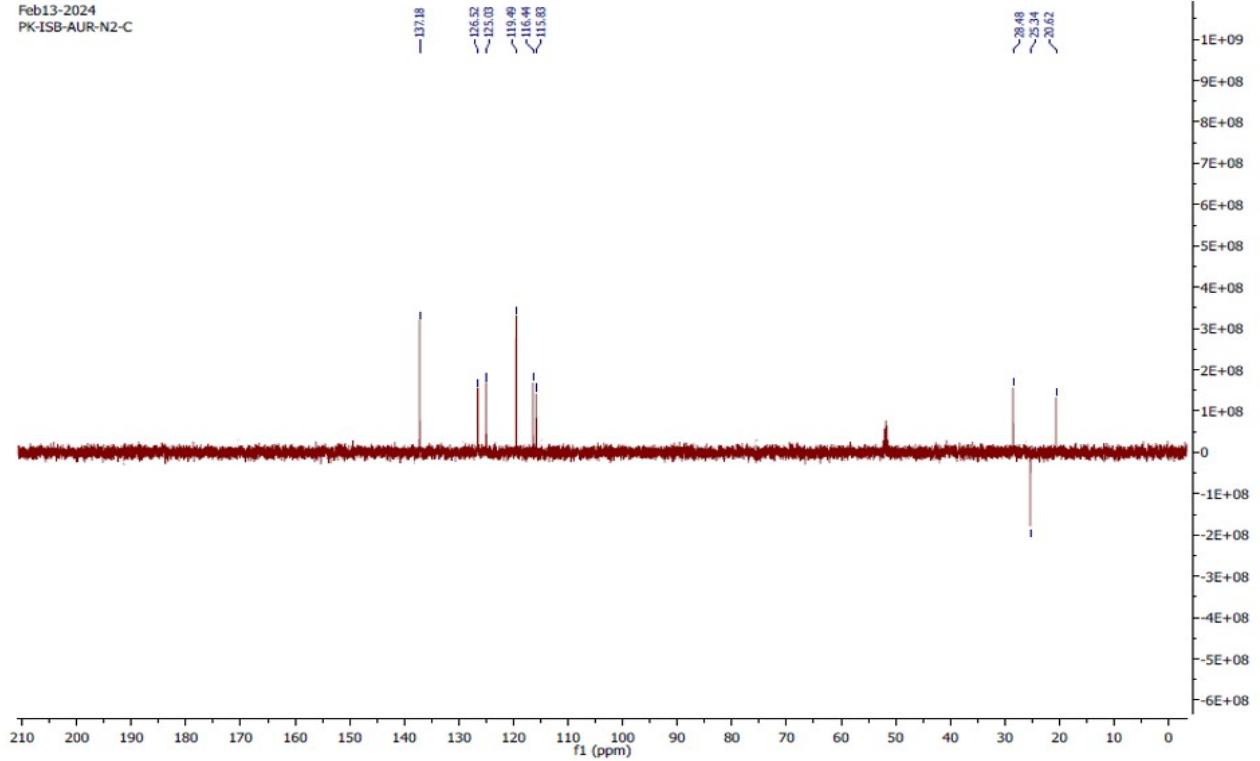

# HRMS of IBC-3

## Elemental Composition Report

Page 1

### Single Mass Analysis

Tolerance = 10.0 PPM / DBE: min = -1.5, max = 50.0

Element prediction: Off

Number of isotope peaks used for i-FIT = 3

Monoisotopic Mass, Even Electron Ions

8 formula(e) evaluated with 1 results within limits (up to 3 closest results for each mass)

Elements Used:

C: 0-20 H: 0-100 O: 0-4

PK-ISB-AUR-N2

QMI DIVISION, CSIR-IIIM JAMMU  
Xevo G2-XS QTOF YFC2015

22-Feb-2024

12:52:07

1: TOF MS ES+  
2.88e+007

220224\_12 8 (0.172)

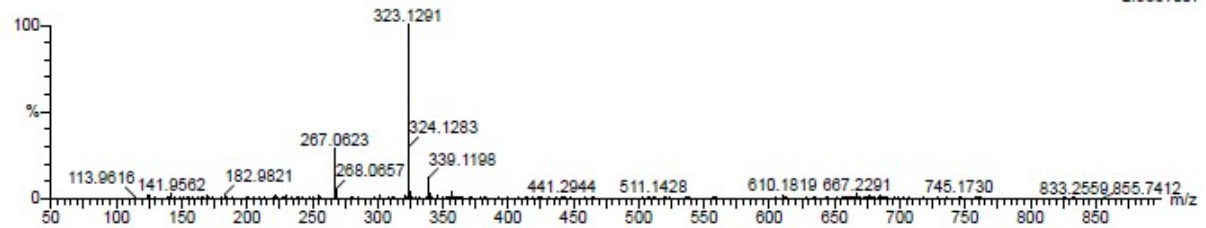

Minimum: -1.5  
Maximum: 2.0 10.0 50.0

| Mass     | Calc. Mass | mDa | PPM | DBE  | i-FIT  | Norm | Conf(%) | Formula    |
|----------|------------|-----|-----|------|--------|------|---------|------------|
| 323.1291 | 323.1283   | 0.8 | 2.5 | 11.5 | 1347.6 | n/a  | n/a     | C20 H19 O4 |

# <sup>1</sup>H NMR of IBC-4

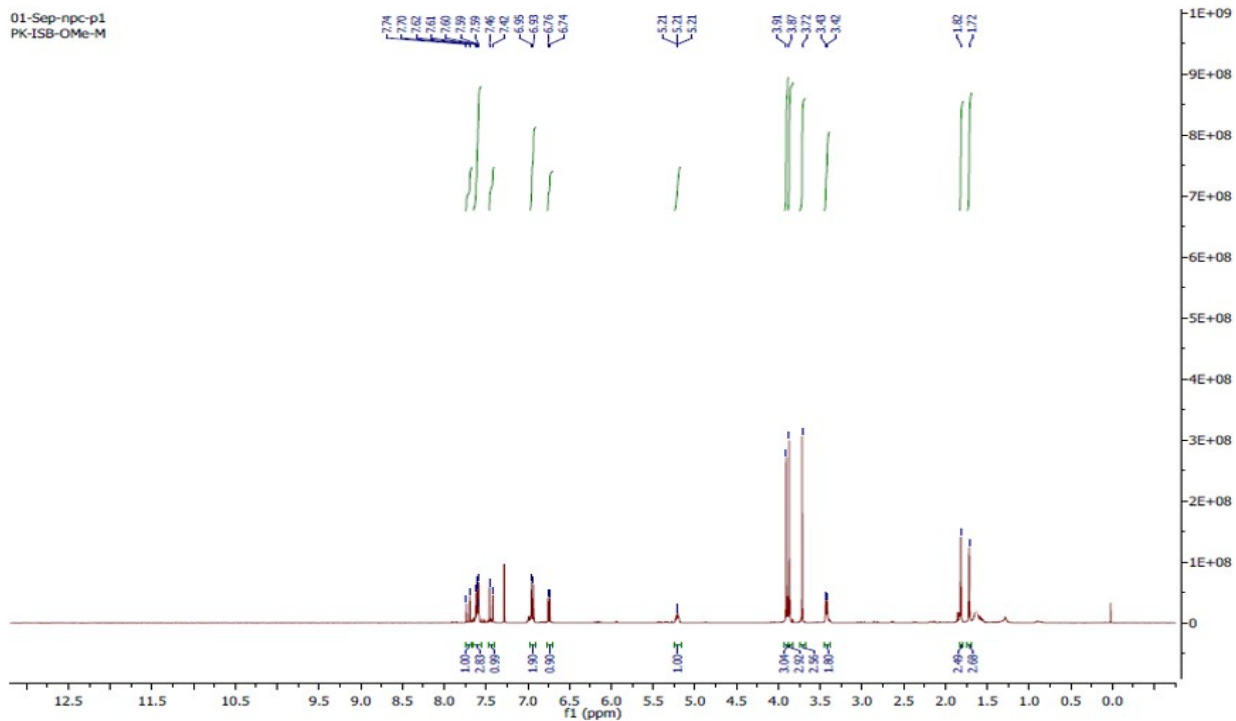

# <sup>13</sup>C NMR of IBC-4

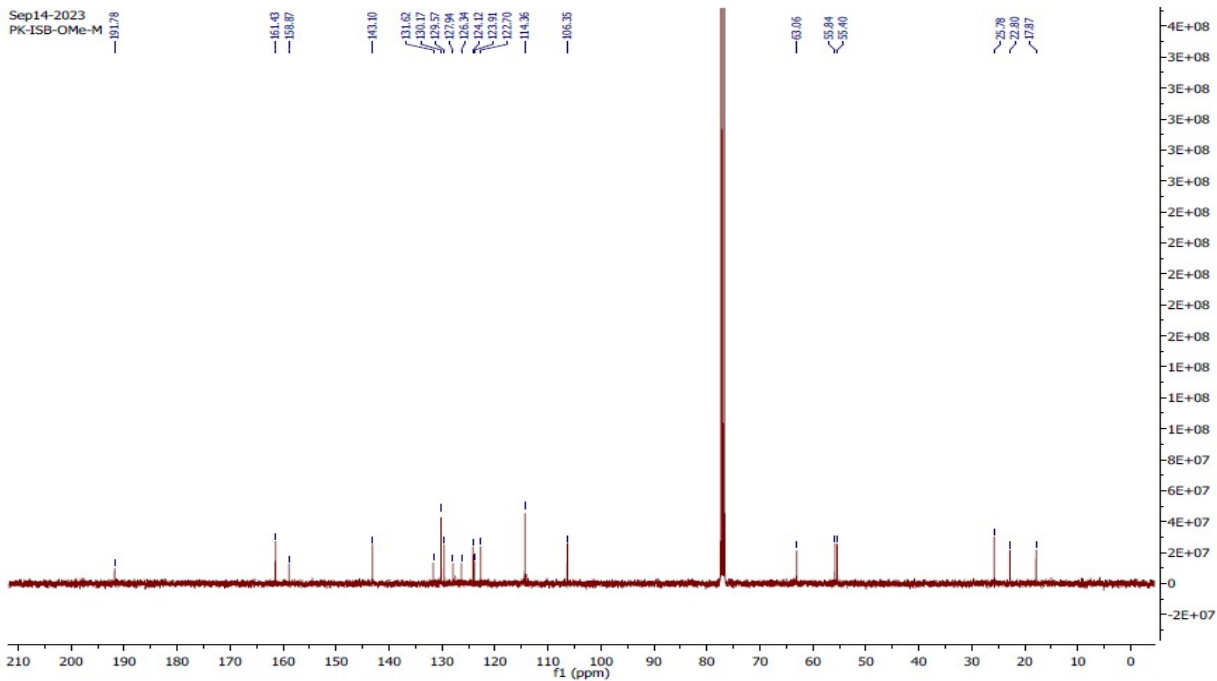

# HRMS of IBC-4

## Elemental Composition Report

Page 1

### Single Mass Analysis

Tolerance = 50.0 PPM / DBE: min = -1.5, max = 50.0

Element prediction: Off

Number of isotope peaks used for i-FIT = 3

Monoisotopic Mass, Even Electron Ions

8 formula(e) evaluated with 1 results within limits (up to 3 closest results for each mass)

Elements Used:

C: 0-23 H: 0-100 O: 0-4

PK-ISB-OMe-M

QMI DIVISION, CSIR-IIIM JAMMU  
Xevo G2-XS QTOF YFC2015

06-Sep-2023

13:25:17

1: TOF MS ES+  
4.33e+006

060923\_09 4 (0.104)

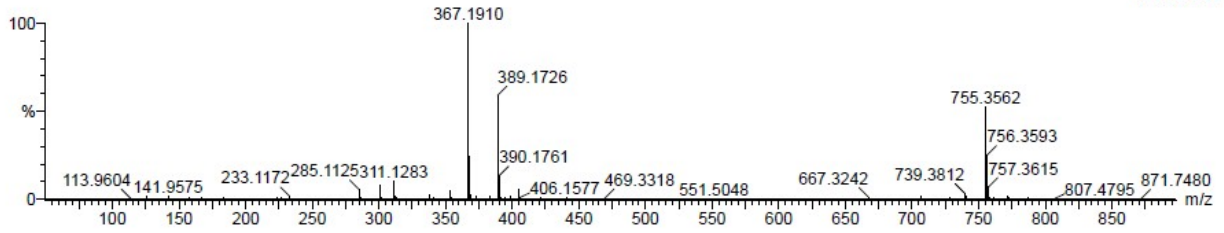

Minimum: -1.5  
Maximum: 2.0 50.0 50.0

| Mass     | Calc. Mass | mDa | PPM | DBE  | i-FIT | Norm | Conf (%) | Formula    |
|----------|------------|-----|-----|------|-------|------|----------|------------|
| 367.1910 | 367.1909   | 0.1 | 0.3 | 10.5 | 953.5 | n/a  | n/a      | C23 H27 O4 |

# <sup>1</sup>H NMR of IBC-5

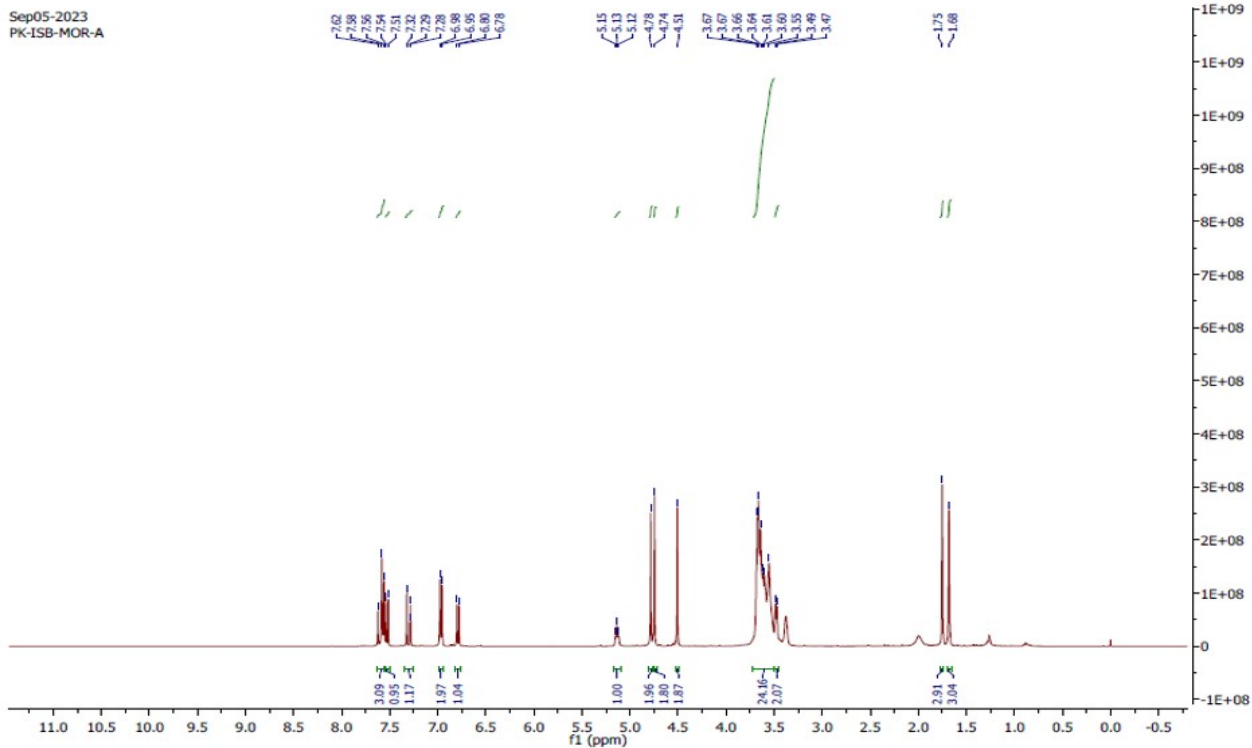

# <sup>13</sup>C NMR of IBC-5

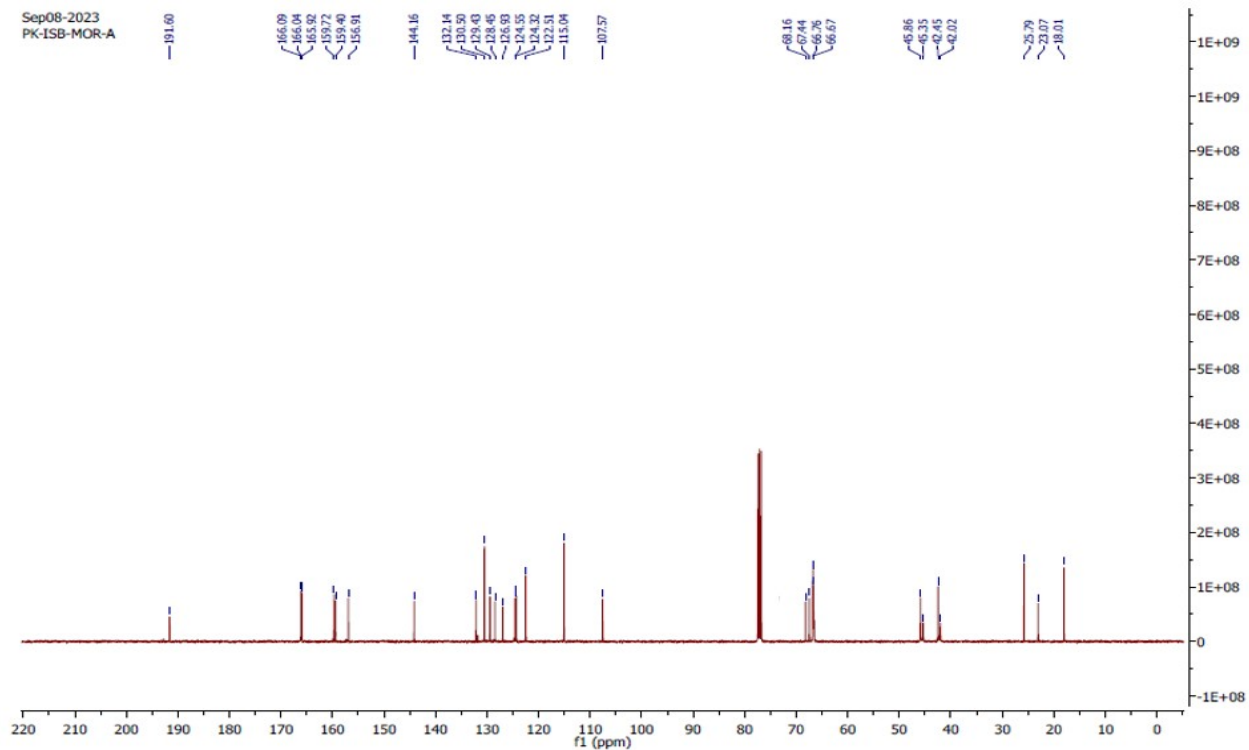

# HRMS of IBC-5

## Elemental Composition Report

Page 1

### Single Mass Analysis

Tolerance = 50.0 PPM / DBE: min = -1.5, max = 50.0

Element prediction: Off

Number of isotope peaks used for i-FIT = 3

Monoisotopic Mass, Even Electron Ions

50 formula(e) evaluated with 1 results within limits (up to 3 closest results for each mass)

Elements Used:

C: 0-38 H: 0-100 N: 0-3 O: 0-10

PK-ISB-MOR-A

QMI DIVISION, CSIR-IIIM JAMMU  
Xevo G2-XS QTOF YFC2015

06-Sep-2023

13:17:10

1: TOF MS ES+

1.73e+006

060923\_06 9 (0.208)

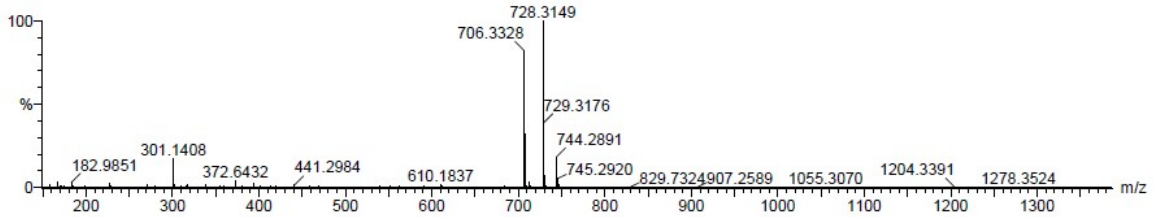

Minimum: -1.5  
Maximum: 2.0 50.0 50.0

| Mass     | Calc. Mass | mDa  | PPM  | DBE  | i-FIT | Norm | Conf (%) | Formula        |
|----------|------------|------|------|------|-------|------|----------|----------------|
| 706.3328 | 706.3340   | -1.2 | -1.7 | 16.5 | 575.8 | n/a  | n/a      | C38 H48 N3 O10 |



# <sup>1</sup>H NMR of IBC-6

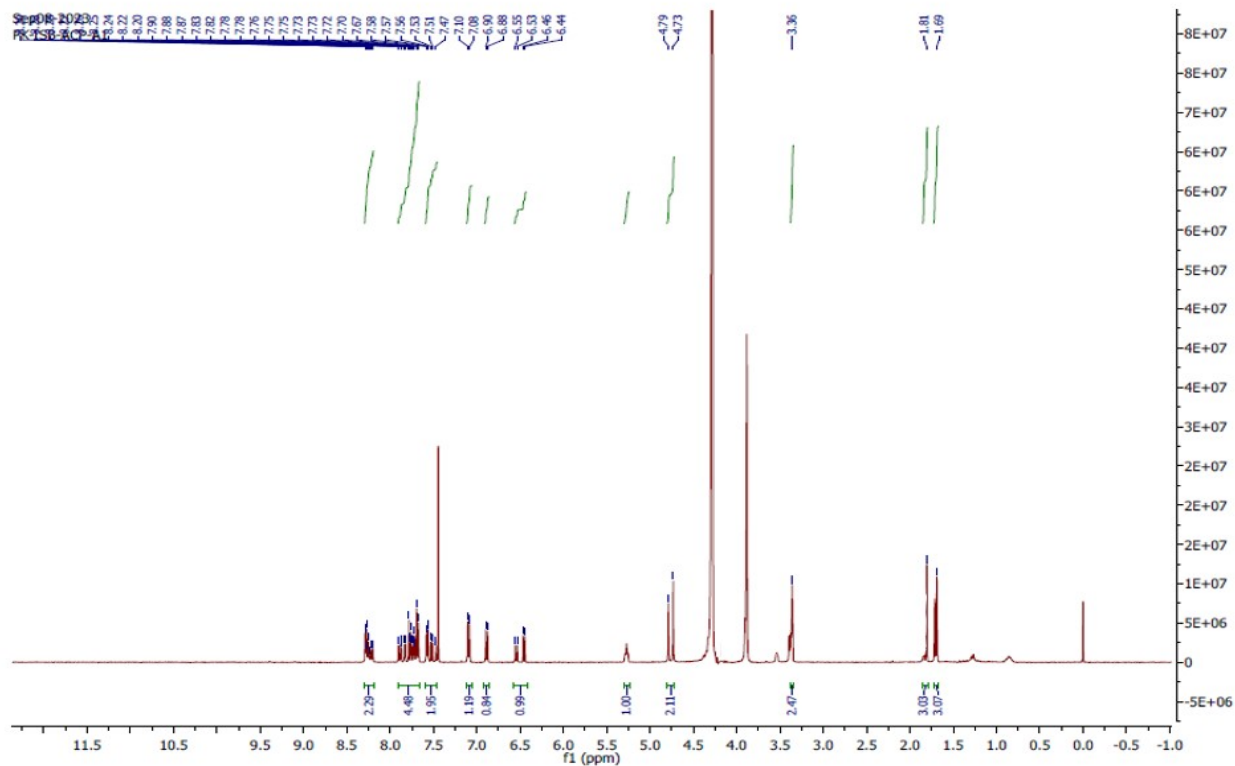

# <sup>13</sup>C NMR of IBC-6

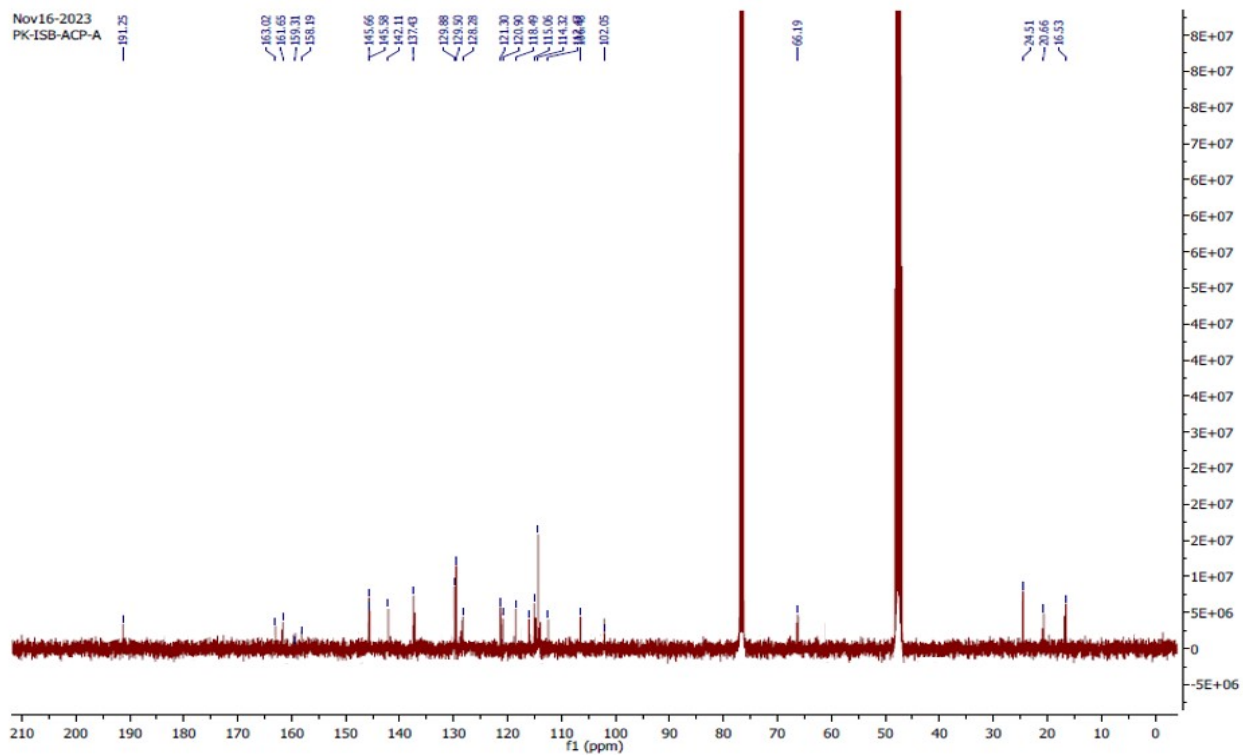

# HRMS of IBC-6

## Elemental Composition Report

Page 1

### Single Mass Analysis

Tolerance = 100.0 PPM / DBE: min = -1.5, max = 50.0

Element prediction: Off

Number of isotope peaks used for i-FIT = 3

Monoisotopic Mass, Even Electron Ions

40 formula(e) evaluated with 1 results within limits (up to 3 closest results for each mass)

Elements Used:

C: 0-27 H: 0-100 N: 0-2 O: 0-5 Cl: 0-1

PK-ISB-ACP

QMI DIVISION, CSIR-IIIM JAMMU  
Xevo G2-XS QTOF YFC2015

11-Jan-2024

15:17:08

1: TOF MS ES+

1.66e+006

110124\_04 4 (0.104)

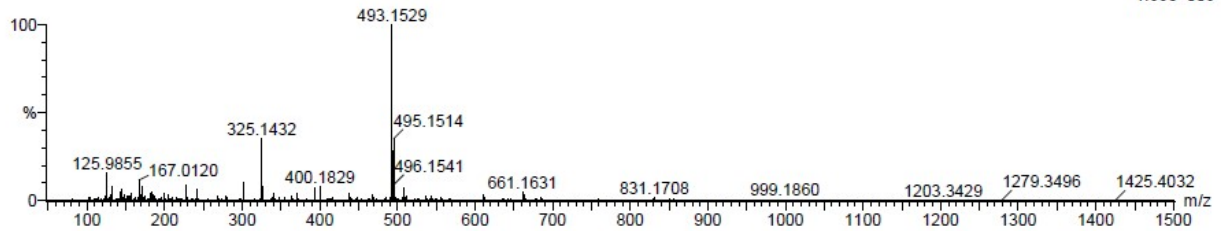

Minimum: -1.5  
Maximum: 2.0 100.0 50.0

| Mass     | Calc. Mass | mDa  | PPM  | DBE  | i-FIT | Norm | Conf (%) | Formula          |
|----------|------------|------|------|------|-------|------|----------|------------------|
| 493.1529 | 493.1530   | -0.1 | -0.2 | 15.5 | 888.7 | n/a  | n/a      | C27 H26 N2 O5 Cl |

# <sup>1</sup>H NMR of IBC-7

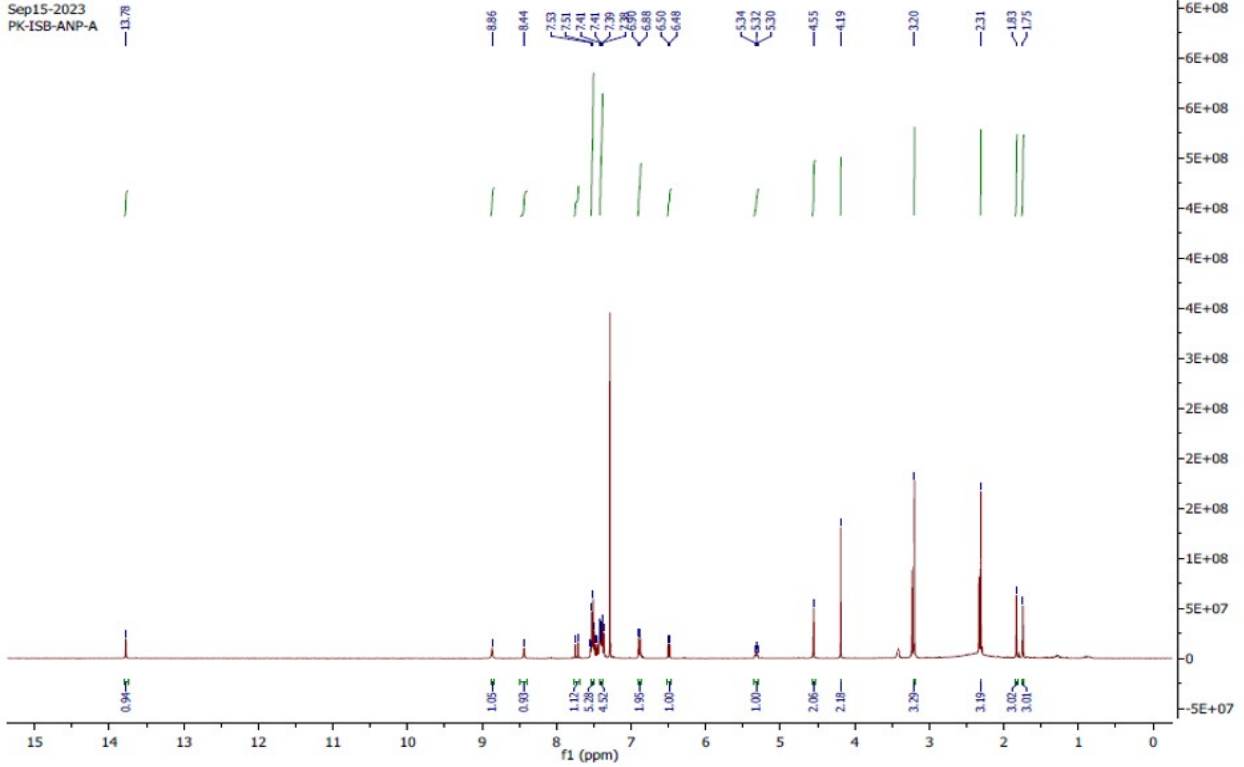

# <sup>13</sup>C NMR of IBC-7

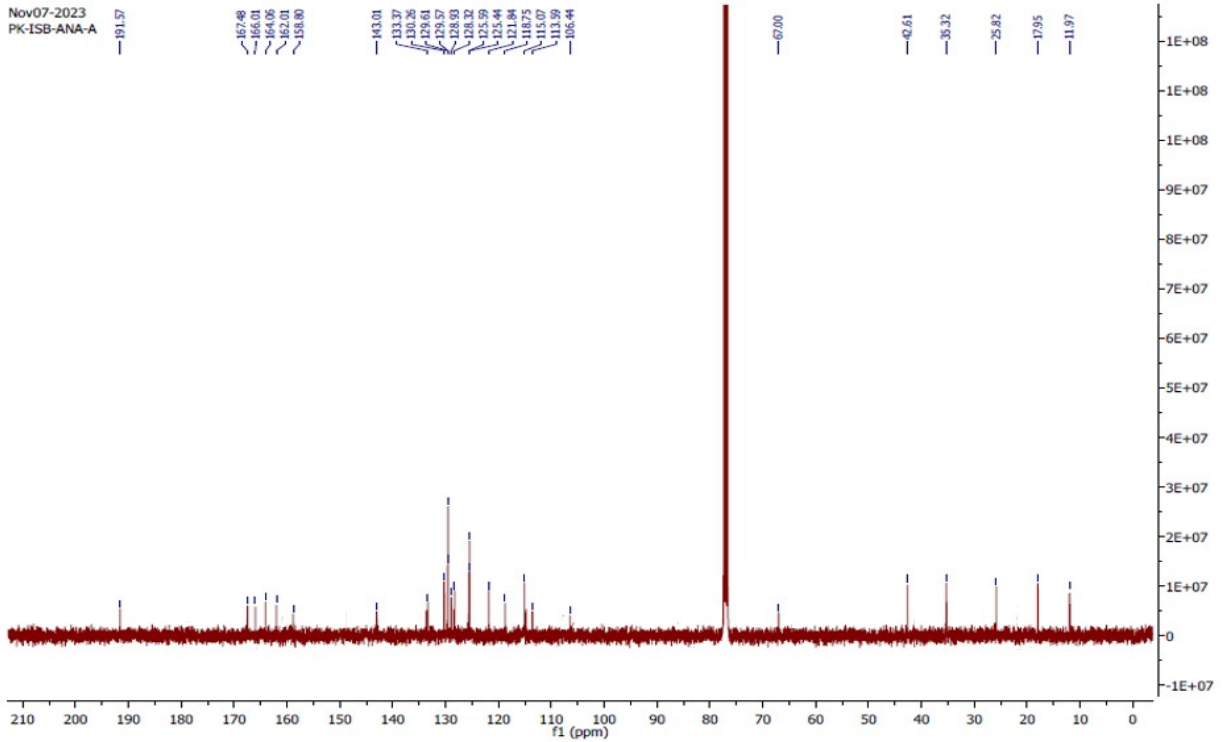

# HRMS of IBC-7

## Elemental Composition Report

Page 1

### Single Mass Analysis

Tolerance = 100.0 PPM / DBE: min = -1.5, max = 50.0

Element prediction: Off

Number of isotope peaks used for i-FIT = 3

Monoisotopic Mass, Even Electron Ions

38 formula(e) evaluated with 1 results within limits (up to 3 closest results for each mass)

Elements Used:

C: 0-33 H: 0-100 N: 0-3 O: 0-6

PK-ISB-ANP

QMI DIVISION, CSIR-IIIM JAMMU  
Xevo G2-XS QTOF YFC2015

11-Jan-2024

15:24:50

1: TOF MS ES+  
7.22e+006

110124\_07 4 (0.104)

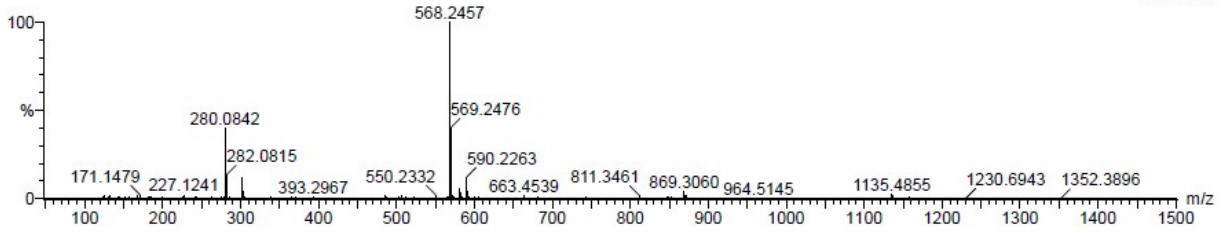

Minimum: -1.5  
Maximum: 2.0 100.0 50.0

| Mass     | Calc. Mass | mDa | PPM | DBE  | i-FIT | Norm | Conf (%) | Formula       |
|----------|------------|-----|-----|------|-------|------|----------|---------------|
| 568.2457 | 568.2448   | 0.9 | 1.6 | 18.5 | 798.0 | n/a  | n/a      | C33 H34 N3 O6 |

# <sup>1</sup>H NMR of IBC-8

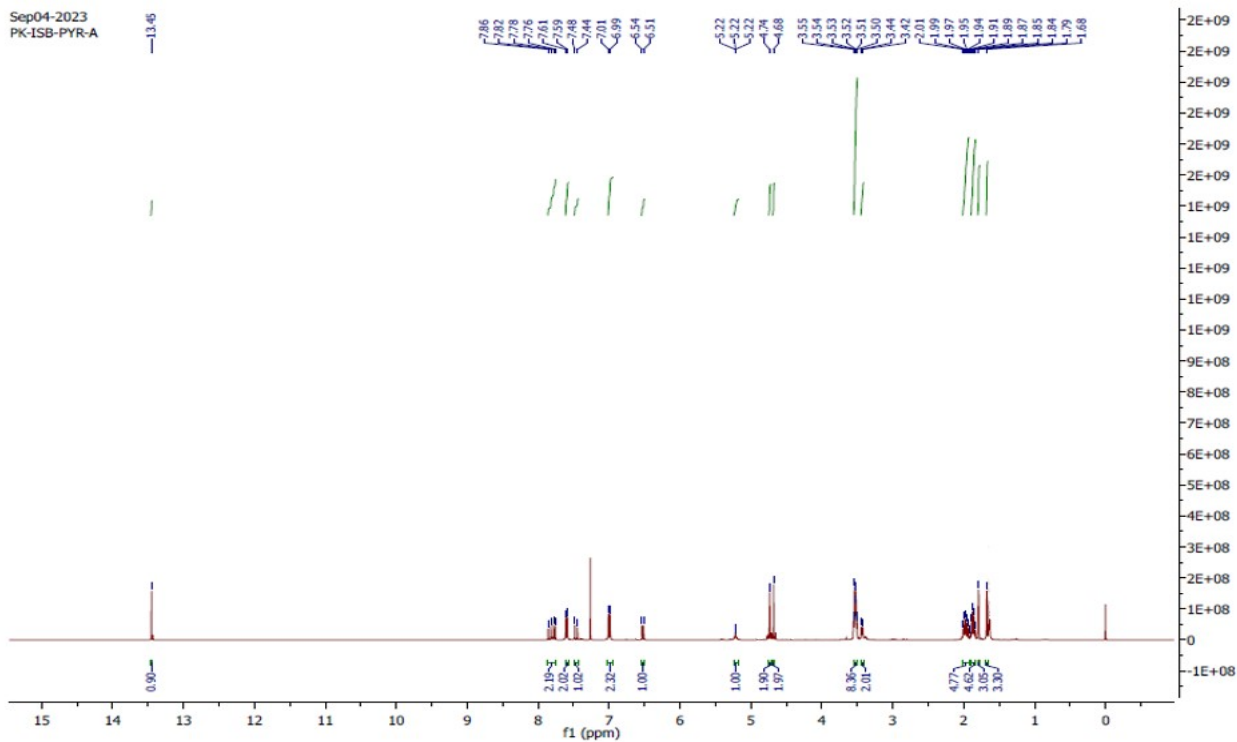

# <sup>13</sup>C NMR of IBC-7

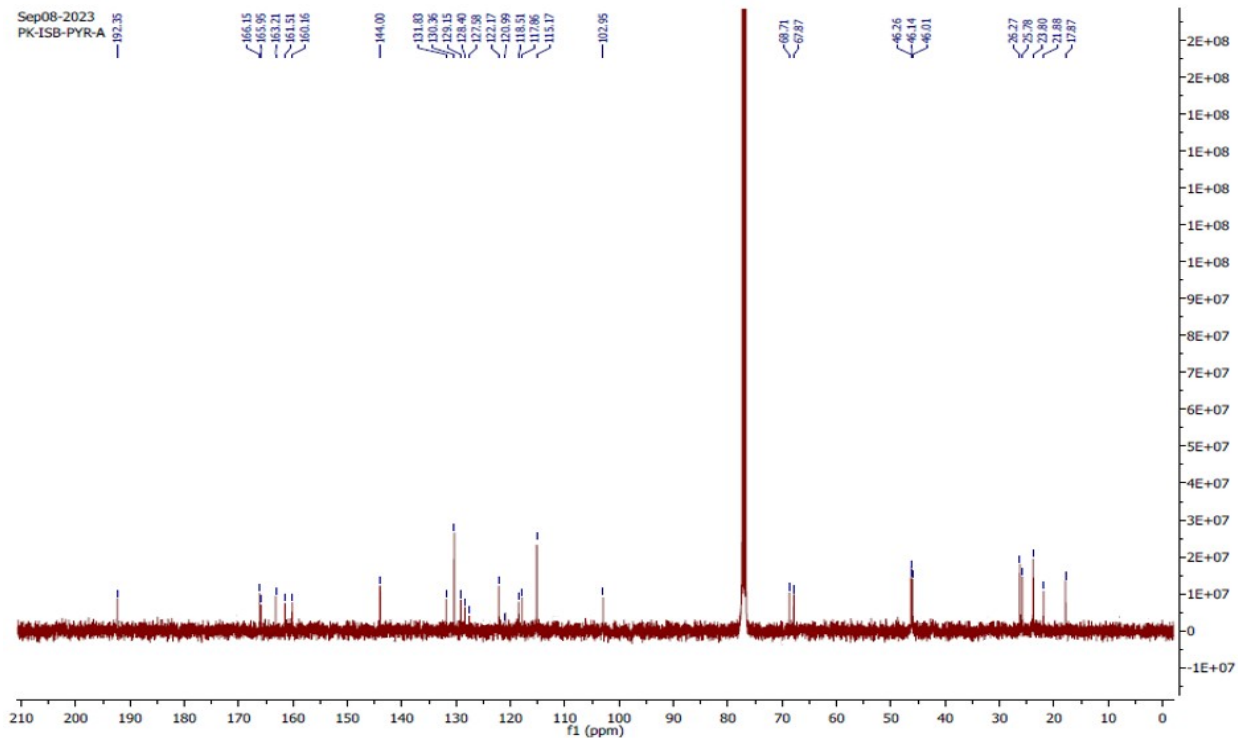

# HRMS of IBC-8

## Elemental Composition Report

Page 1

### Single Mass Analysis

Tolerance = 50.0 PPM / DBE: min = -1.5, max = 50.0

Element prediction: Off

Number of isotope peaks used for i-FIT = 3

Monoisotopic Mass, Even Electron Ions

25 formula(e) evaluated with 1 results within limits (up to 3 closest results for each mass)

Elements Used:

C: 0-32 H: 0-100 N: 0-2 O: 0-6

PK-ISB-PYR-A

QMI DIVISION, CSIR-IIIM JAMMU  
Xevo G2-XS QTOF YFC2015

06-Sep-2023

13:19:43

1: TOF MS ES+  
2.67e+006

060923\_07 8 (0.172)

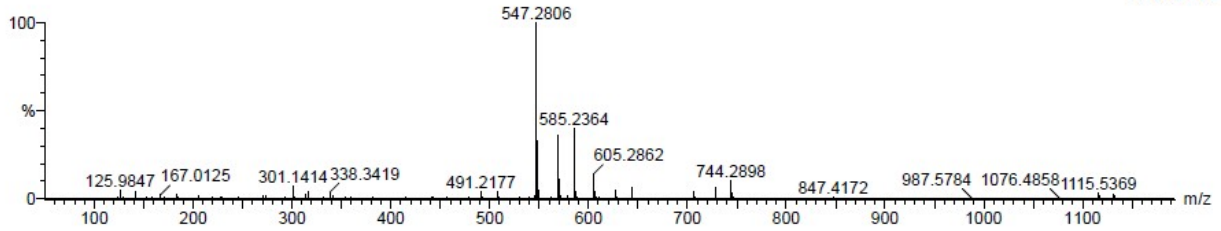

Minimum: -1.5  
Maximum: 2.0 50.0 50.0

| Mass     | Calc. Mass | mDa  | PPM  | DBE  | i-FIT | Norm | Conf (%) | Formula       |
|----------|------------|------|------|------|-------|------|----------|---------------|
| 547.2806 | 547.2808   | -0.2 | -0.4 | 14.5 | 752.5 | n/a  | n/a      | C32 H39 N2 O6 |

### <sup>1</sup>H NMR of IBC-9

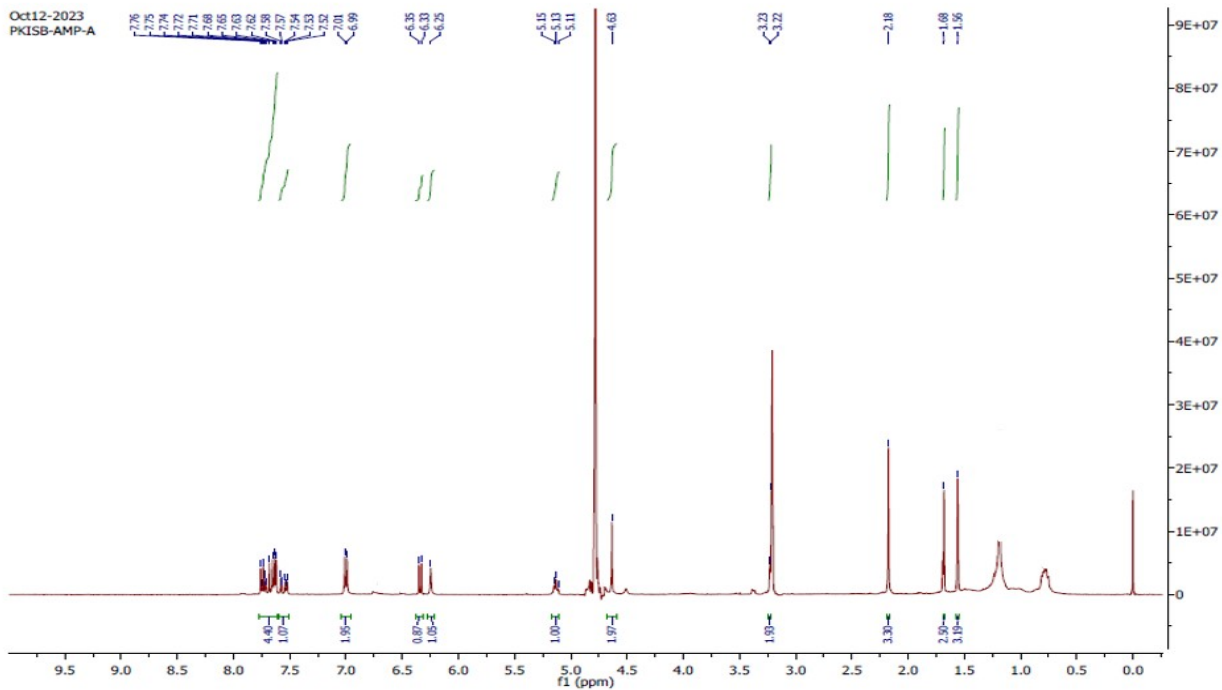

### <sup>13</sup>C NMR of IBC-9

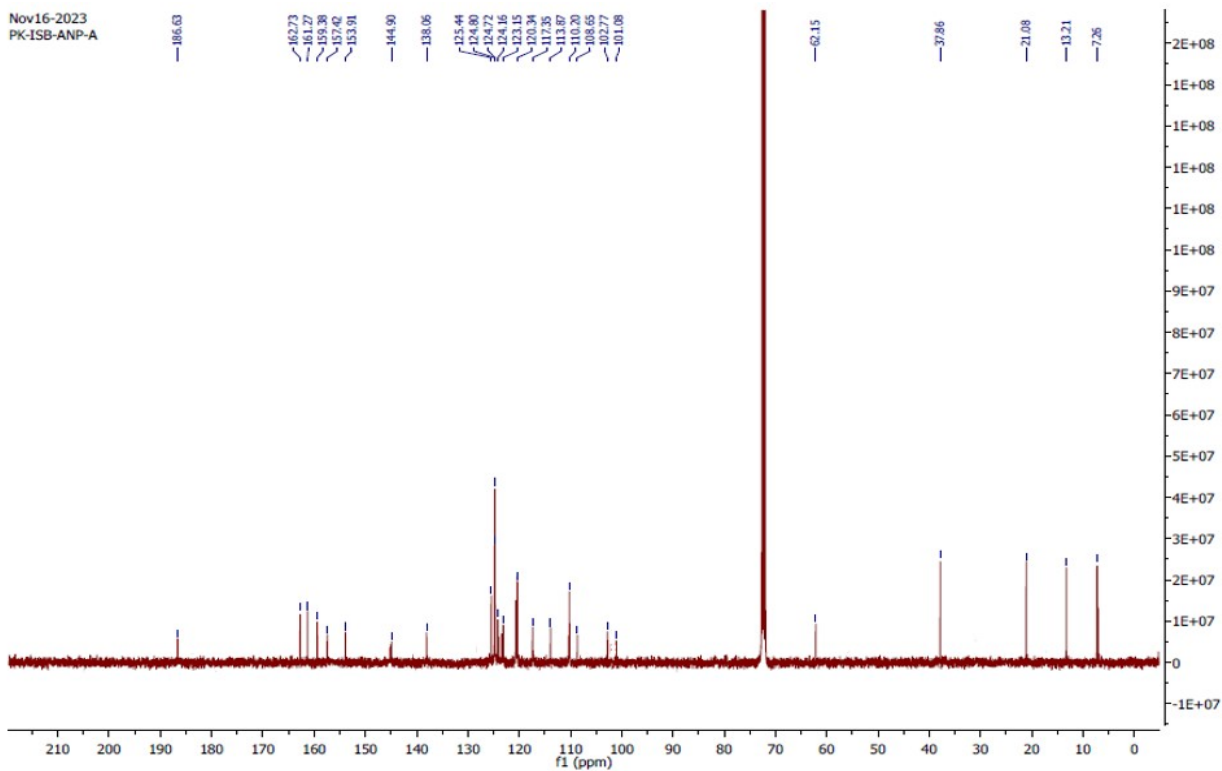

# HRMS of IBC-9

## Elemental Composition Report

Page 1

### Single Mass Analysis

Tolerance = 100.0 PPM / DBE: min = -1.5, max = 50.0

Element prediction: Off

Number of isotope peaks used for i-FIT = 3

Monoisotopic Mass, Even Electron Ions

28 formula(e) evaluated with 1 results within limits (up to 3 closest results for each mass)

Elements Used:

C: 0-26 H: 0-100 N: 0-3 O: 0-5

PK-ISB-AMP

QMI DIVISION, CSIR-IIIM JAMMU  
Xevo G2-XS QTOF YFC2015

11-Jan-2024  
15:19:42  
1: TOF MS ES+  
3.00e+007

110124\_05 8 (0.172)

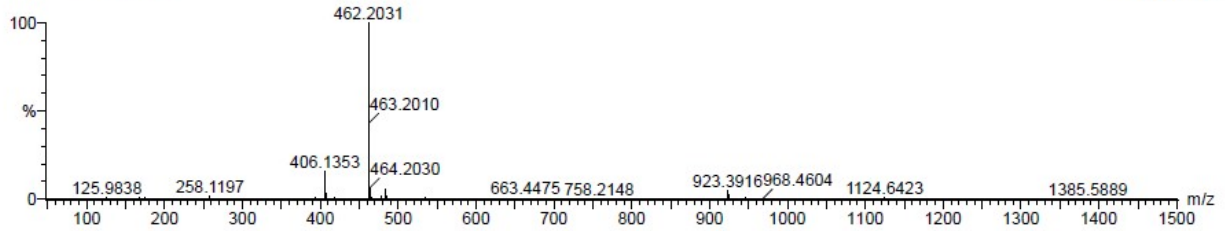

Minimum: -1.5  
Maximum: 2.0 100.0 50.0

| Mass     | Calc. Mass | mDa | PPM | DBE  | i-FIT  | Norm | Conf (%) | Formula                                                       |
|----------|------------|-----|-----|------|--------|------|----------|---------------------------------------------------------------|
| 462.2031 | 462.2029   | 0.2 | 0.4 | 14.5 | 1022.3 | n/a  | n/a      | C <sub>26</sub> H <sub>28</sub> N <sub>3</sub> O <sub>5</sub> |



# <sup>1</sup>H NMR of IBC-10

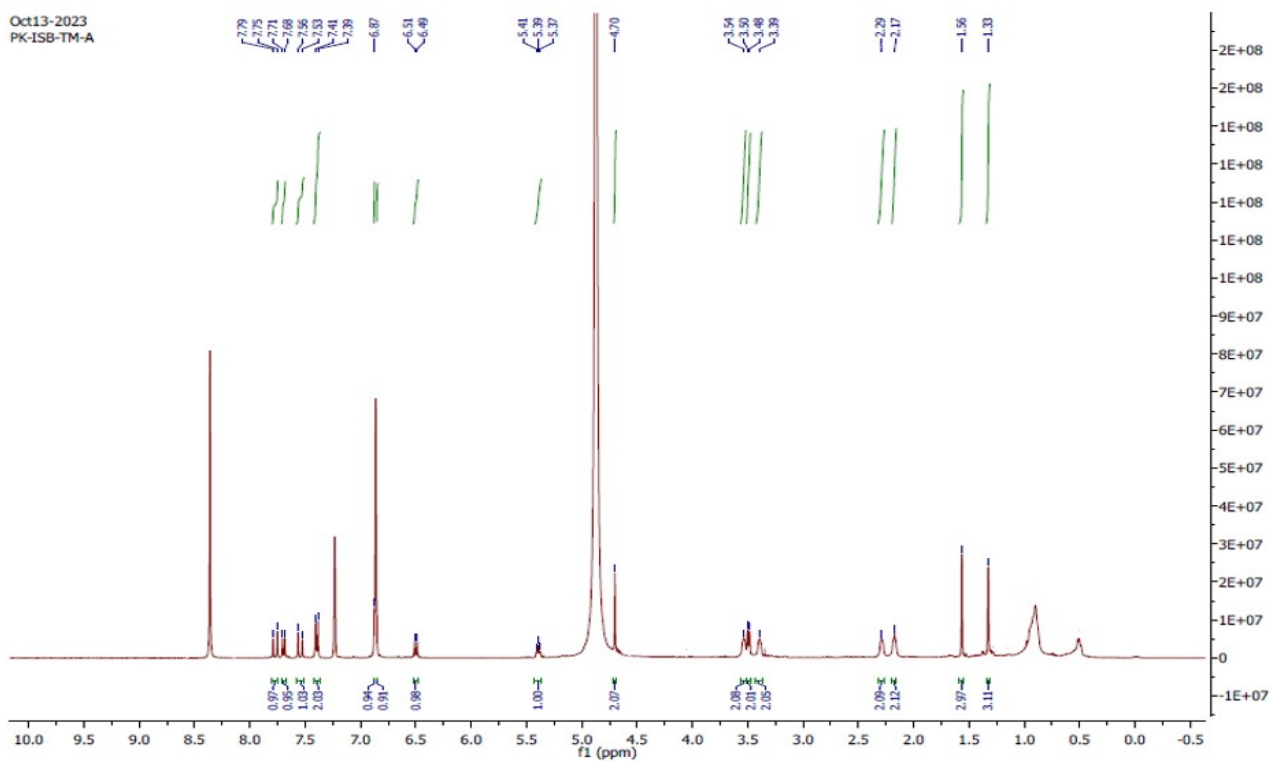

# <sup>13</sup>C NMR of IBC-10

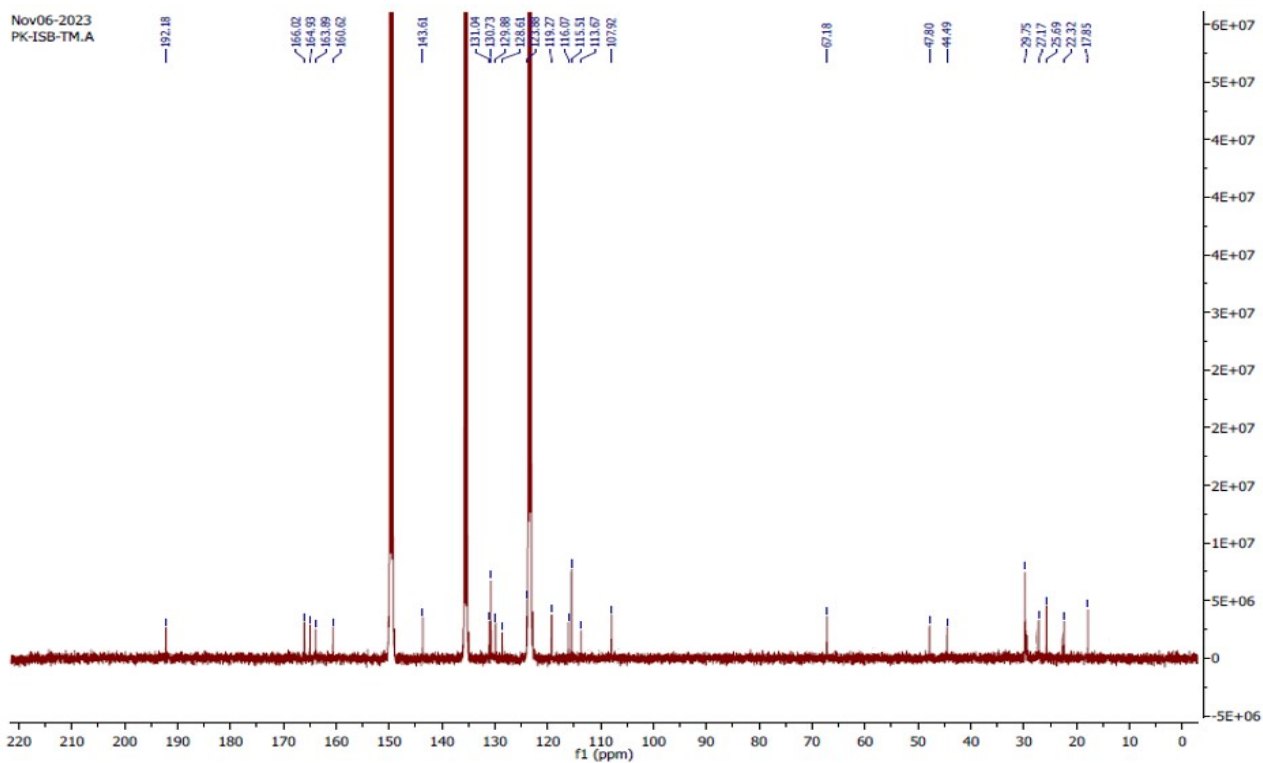

# HRMS of IBC-10

## Elemental Composition Report

### Single Mass Analysis

Tolerance = 100.0 PPM / DBE: min = -1.5, max = 50.0

Element prediction: Off

Number of isotope peaks used for i-FIT = 3

Monoisotopic Mass, Even Electron Ions

28 formula(e) evaluated with 1 results within limits (up to 3 closest results for each mass)

Elements Used:

C: 0-26 H: 0-100 N: 0-1 O: 0-5 S: 0-1

PK-ISB-TM

QMI DIVISION, CSIR-IIIM JAMMU  
Xevo G2-XS QTOF YFC2015

11-Jan-2024  
15:22:16  
1: TOF MS ES+  
1.51e+007

110124\_06 5 (0.121)

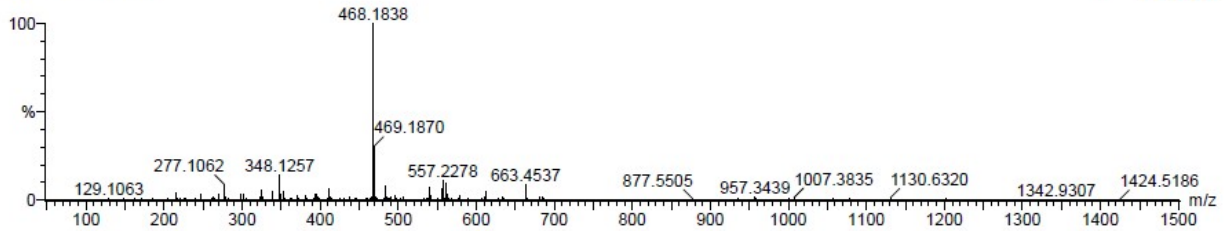

Minimum: -1.5  
Maximum: 2.0 100.0 50.0

| Mass     | Calc. Mass | mDa  | PPM  | DBE  | i-FIT | Norm | Conf(%) | Formula        |
|----------|------------|------|------|------|-------|------|---------|----------------|
| 468.1838 | 468.1845   | -0.7 | -1.5 | 12.5 | 967.4 | n/a  | n/a     | C26 H30 N O5 S |

1a

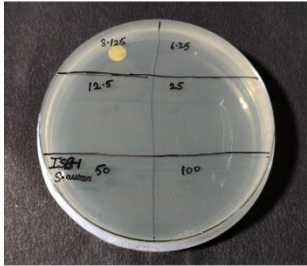

1b

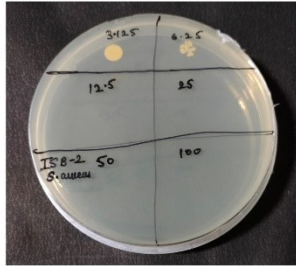

1c

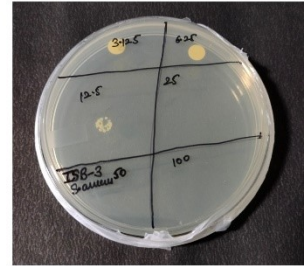

2a

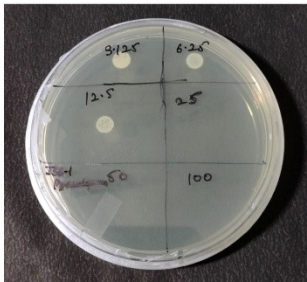

2b

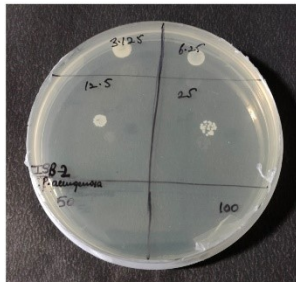

2c

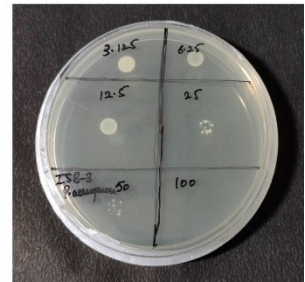

3

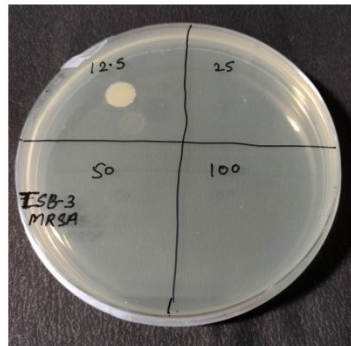

4

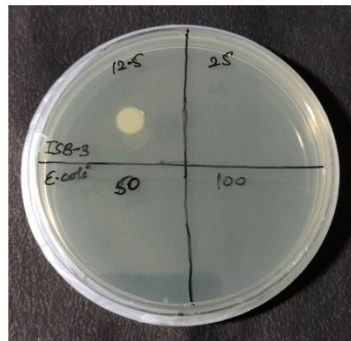

Figures- MBC of potent inhibitors against *S. aureus*, MRSA, *E. coli* and *P. aeruginosa*.

**Figure 1a, 1b, 1c-** MBC of IBC, IBC-2 and IBC-3 against *S. aureus*

**Figure 2a, 2b, 2c-** MBC of IBC, IBC-2 and IBC-3 against *P. aeruginosa*

**Figure 3-** MBC of IBC-3 against MRSA

**Figure 4-** MBC of IBC-3 against *E. coli*
